# Supplementary material for: Multipronged Approach to Profiling Metabolites in <em>Beta Vulgaris</em> L Dried Pulp Extracts Using Chromatography, NMR, and Other Spectroscopy Methods
Source: Preprints.org preprint supplement (doi:10.20944/preprints202308.0182.v1), 2023-08-02
Supplement: Supplementary file 1 [file supplementary]

**Supporting Information**

**Multipronged Approach to Profiling Metabolites in *Beta Vulgaris* Dried Pulp Extract Using Chromatography, NMR, and other Spectroscopy Methods**

Joshua Fiadorwu1, Kiran Subedi2, Daniel Todd3, and Mufeed M. Basti1*

**Affiliation**

1 Department of Applied Science and Technology, College of Science and Technology, North Carolina Agricultural and Technical State University, Greensboro, NC, USA.

1*Department of Chemistry, North Carolina Agricultural and Technical State University, Greensboro, NC, USA.

2Analytical Services Laboratory, College of Agriculture and Environmental Sciences (CAES), North Carolina Agricultural and Technical State University, Greensboro, NC, USA.

3 Triad Mass Spectrometry Facility, University of North Carolina at Greensboro, NC, USA.

**Correspondence**

Mufeed M. Basti

Professor

NC A&T State University

Department of Chemistry

Science Building

Greensboro, NC 27455

Ph. (336)285-2229

basti@ncat.edu

**Contents**

Figure S1. COSY spectrum showing the amino acid Leucine (D2O-salt, 400 MHz).


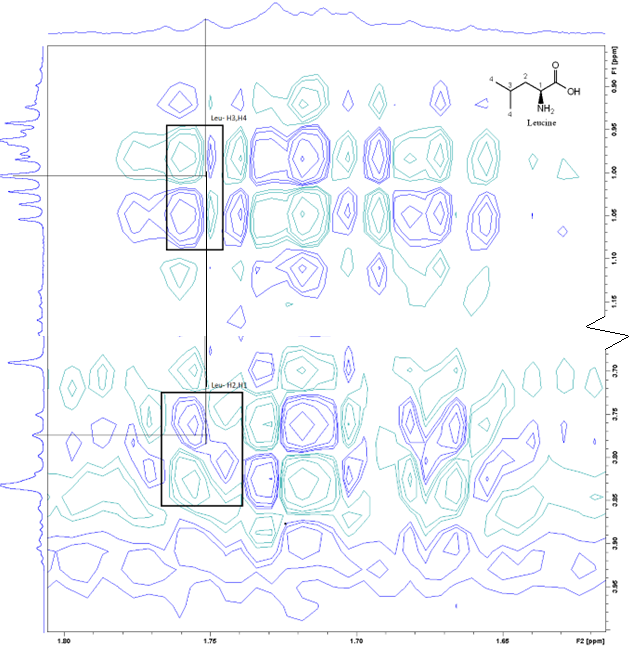


Figure S1. COSY spectrum showing the amino acid Leucine.


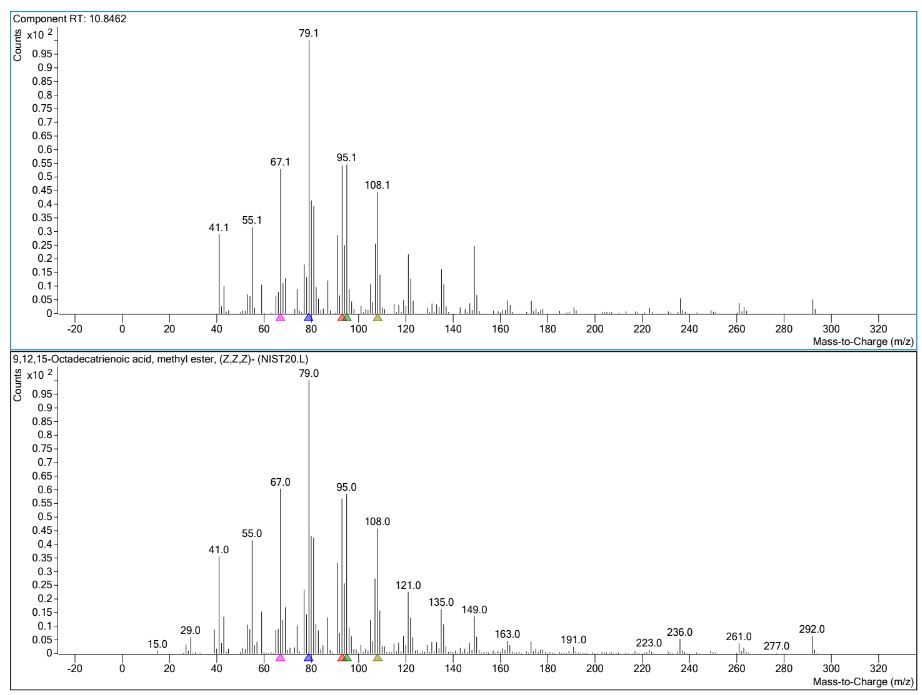


Figure S2. MS spectra of 9,12,15-Octadecatrienoic acid, methyl ester, (Z,Z,Z) (RT = 10.846 min.) experiment spectrum overlaid with the reference library spectrum.


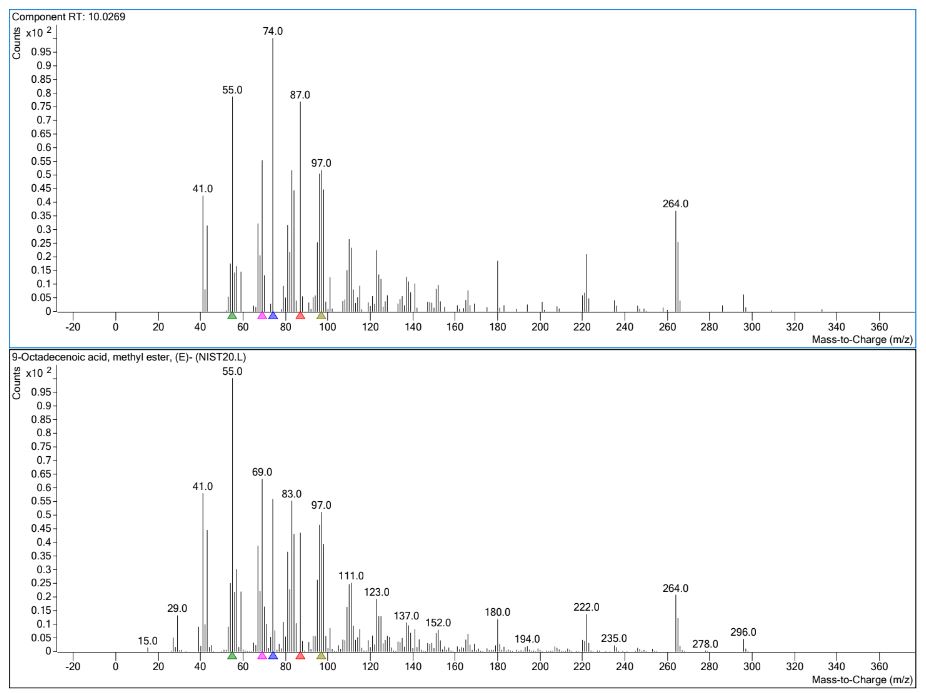


Figure S3. MS spectra of 9-Octadecenoic acid, methyl ester, (E) (RT = 10.027 min.) experiment spectrum overlaid with the reference library spectrum.


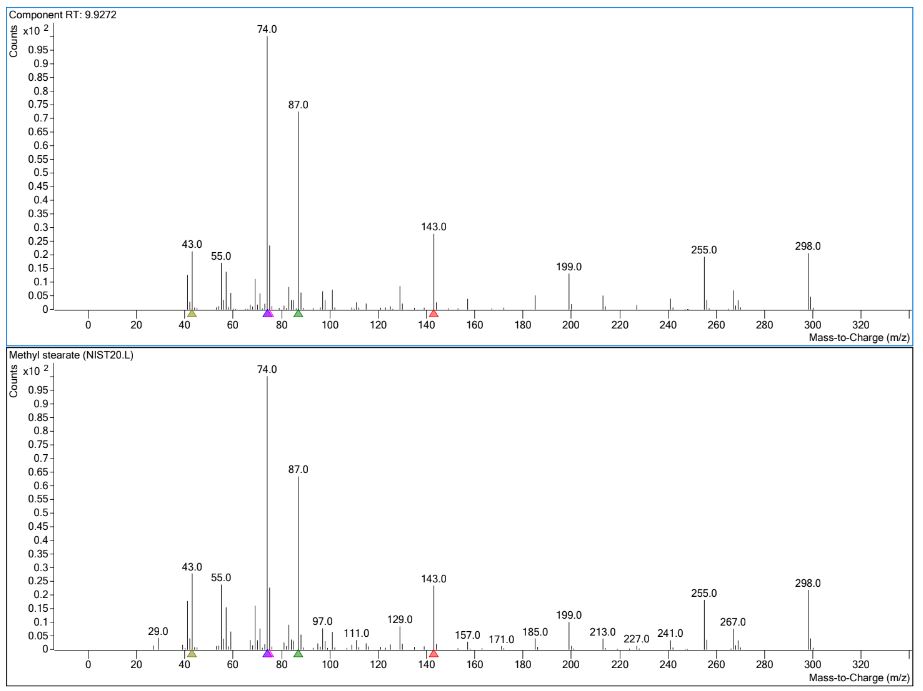


Figure S4. MS spectra of methyl stearate (RT = 9.927 min.) experiment spectrum overlaid with the reference library spectrum.


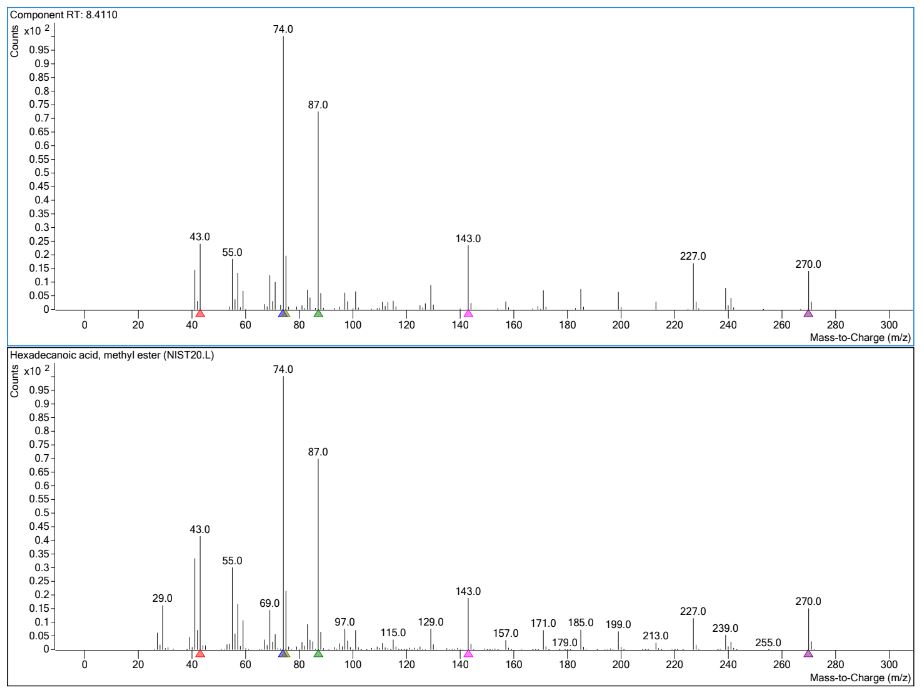


Figure S5. MS spectra of hexadecanoic acid, methyl ester (RT = 8.411 min.) experiment spectrum overlaid with the reference library spectrum.

Figure S6. Proton-decoupled 31P NMR spectra of polar extract (A) in D2O and non-polar extract (B) in CDCl3 on a 400 MHz spectrometer, ns = 10,000 at 25°C temperature, and 20 Hz line-broadening. Chemical shift is based on the 31P peak of 85% phosphoric acid, which is set at 0 PPM.

Figure S6 shows the proton-decoupled 31P spectra of the polar extract in D2O (A) and non-polar extract in CDCl3 (B). The chemical shift of 31P peaks in both media falls between 0 and 6.5 PPM. The peaks were then assigned to orthophosphate monoester (polar phase), and to orthophosphate diester (non-polar phase)[1]. It is interesting to note that no 31P signals were observed in the middle layer that we obtain during extraction: The middle layer contains molecules that are not soluble in H2O/methanol or CHCl3. This suggests that phosphorus compounds (mono- and di-ester orthophosphate) split during the extraction between the polar and non-polar phases according to their polarity and the polarity of the phase.

References

[1] B. J. Cade-Menun, “Improved peak identification in 31P-NMR spectra of environmental samples with a standardized method and peak library,” *Geoderma*, vol. 257–258, pp. 102–114, 2015.
